# Supplementary material
Source: PubMed Central journal article supplement (PMC7929789)

# THE LANCET

## Child & Adolescent Health

### Supplementary appendix

This appendix formed part of the original submission and has been peer reviewed. We post it as supplied by the authors.

Supplement to: Kappanayil M, Balan S, Alawani S, et al. Multisystem inflammatory syndrome in a neonate, temporally associated with prenatal exposure to SARS-CoV-2: a case report. *Lancet Child Adolesc Health* 2021; published online March 3. [http://dx.doi.org/10.1016/S2352-4642\(21\)00055-9](http://dx.doi.org/10.1016/S2352-4642(21)00055-9).

## APPENDIX

### Supplementary File 1

Supplementary File 1 shows the trends of hematological markers (total leucocyte count, % neutrophils, % lymphocytes, total platelet count) and C-Reactive Protein during the course of illness.

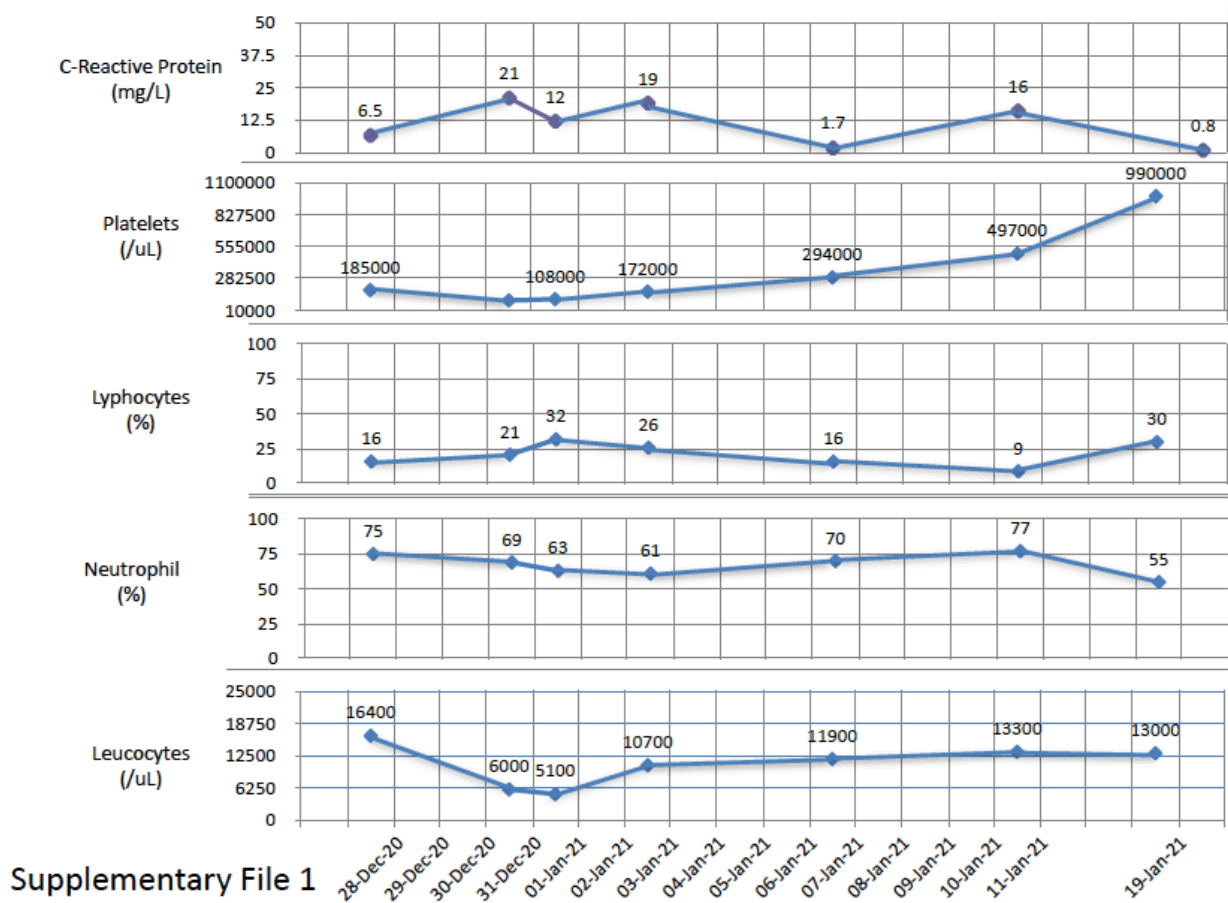

## **Supplementary File 2**

Supplementary File 2 shows echocardiographic image of the right coronary artery (RCA) with prominent, hyper-echogenic, thick-walled appearance. The image was obtained in the left parasternal short-axis view using a high-frequency (12Megahertz) neonatal echocardiography probe.

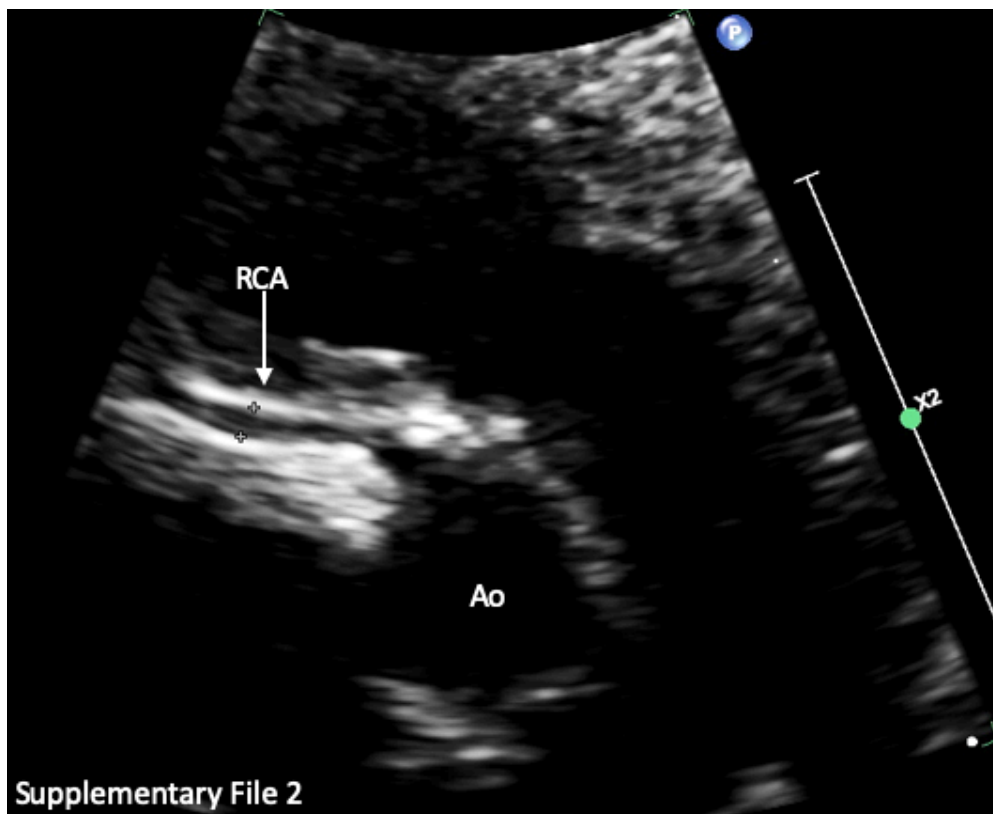

Supplement: mmc1.pdf [file mmc1.pdf]
